# Supplementary material
Source: PubMed Central journal article supplement (PMC7423331)

Supplement Table 1: Standardized regression weights ( $\beta$ )<sup>a</sup> for a linear regression with respect to PS-TRE, literacy, and numeracy for employed people with computer use at work and at home. Supplement Figure 1, Panel 1a, 2a, and 3a visualize the beta weights including their 95% confidence intervals.

|                                | PS-TRE | PS-TRE             | Literacy | Numeracy |
|--------------------------------|--------|--------------------|----------|----------|
| Age (generation)               | -.322* | -.318*             | -.207*   | -.129*   |
| Gender (f)                     | -.040  | -.040              | -.026    | -.145*   |
| Migration (y)                  | -.161* | -.170*             | -.166*   | -.140*   |
| Years of Education             | .251*  | .275*              | .341*    | .363*    |
| Cultural Capital (#Books >100) | .142*  | .149*              | .180*    | .153*    |
| Further Education (y)          | .039   | .050*              | .078*    | .050*    |
| Internet Use at Home (1-4)     | .104*  | .110*              | .060*    | .007     |
| Application use at Home (1-4)  | .047   | .100*              | .082*    | .129*    |
| Internet Use at Work (1-4)     | -.026  | EXCL. <sup>b</sup> | N/A      | N/A      |
| Application use at Work (1-4)  | .172*  | EXCL. <sup>b</sup> | N/A      | N/A      |

<sup>a</sup> all standard errors ( $\beta$ ) < .036

<sup>b</sup> these variables were excluded for comparability reasons

\* statistically significant,  $p < .05$

Supplement Table 2: Standardized regression weights ( $\beta$ )<sup>a</sup> for a linear regression with respect to PS-TRE, literacy, and numeracy for employed people with computers only at home. Supplement Figure 1, Panel 1b, 2b, and 3b visualize the beta weights including their 95% confidence intervals.

|                                | PS-TRE | Literacy | Numeracy |
|--------------------------------|--------|----------|----------|
| Age (generation)               | -.345* | -.263*   | -.124*   |
| Gender (f)                     | .015   | .034     | -.079    |
| Migration (y)                  | -.185* | -.152*   | -.126*   |
| Years of Education             | .111*  | .194*    | .209*    |
| Cultural Capital (#Books >100) | .098*  | .127*    | .121*    |
| Further Education (y)          | .013   | .034     | .006     |
| Internet Use at Home (1-4)     | .154*  | .188*    | .145*    |
| Application use at Home (1-4)  | .206*  | .125*    | .150*    |

<sup>a</sup> all standard errors ( $\beta$ ) < .063

\* statistically significant,  $p < .05$

Supplement Table 3: Standardized regression weights ( $\beta$ )<sup>a</sup> for a linear regression with respect to PS-TRE, literacy, and numeracy for people that are out of the labor force (OLF). Supplement Figure 1, Panel 1c, 2c, and 3c visualize the beta weights including their 95% confidence intervals.

|                                | PS-TRE | Literacy | Numeracy |
|--------------------------------|--------|----------|----------|
| Age (generation)               | -.527* | -.436*   | -.272*   |
| Gender (f)                     | -.130* | -.084*   | -.185*   |
| Migration (y)                  | -.245* | -.203*   | -.192*   |
| Years of Education             | .289*  | .395*    | .394*    |
| Cultural Capital (#Books >100) | .137*  | .197*    | .218*    |
| Further Education (y)          | .070   | .058     | .016     |
| Internet Use at Home (1-4)     | .159*  | .111*    | .099*    |
| Application use at Home (1-4)  | .059   | .039     | .080     |

<sup>a</sup> all standard errors ( $\beta$ ) < .052

\* statistically significant,  $p < .05$

Supplement Table 4: F-Values for the increase in the explained variance ( $\Delta R^2$ ) with respect to PS-TRE, literacy, and numeracy for employed people with computer use at work and at home.

|                                | df1 | df2  | PS-TRE  | Literacy | Numeracy |
|--------------------------------|-----|------|---------|----------|----------|
| Age (generation)               | 1   | 2738 | 206.09* | 47.35*   | 0.00     |
| Gender (f)                     | 1   | 2738 | 11.83*  | 5.58*    | 78.87*   |
| Migration (y)                  | 1   | 2738 | 117.55* | 117.30*  | 90.20*   |
| Years of Education             | 1   | 2738 | 414.15* | 619.73*  | 637.47*  |
| Cultural Capital (#Books >100) | 1   | 2738 | 87.28*  | 121.61*  | 86.43*   |
| Further Education (y)          | 1   | 2738 | 11.30*  | 20.01*   | 8.45*    |
| Computer use at Home           | 2   | 2737 | 81.88*  | 37.06*   | 48.47*   |
| Computer use at Work           | 2   | 2737 | 63.70*  | 40.49*   | 25.97*   |

\* statistically significant,  $p < .05$

Supplement Table 5: F-Values for the increase in the explained variance ( $\Delta R^2$ ) with respect to PS-TRE, literacy, and numeracy for employed people with computers only at home.

|                                | df1 | df2 | PS-TRE  | Literacy | Numeracy |
|--------------------------------|-----|-----|---------|----------|----------|
| Age (generation)               | 1   | 654 | 109.46* | 50.14*   | 8.64*    |
| Gender (f)                     | 1   | 654 | 1.53    | 2.13*    | 4.01*    |
| Migration (y)                  | 1   | 654 | 39.00*  | 30.29*   | 22.53*   |
| Years of Education             | 1   | 654 | 18.58*  | 43.15*   | 43.40*   |
| Cultural Capital (#Books >100) | 1   | 654 | 10.26*  | 15.70*   | 14.26*   |
| Further Education (y)          | 1   | 654 | 1.33    | 0.67     | 0.67     |
| Computer use at Home           | 2   | 653 | 61.07*  | 46.41*   | 40.43*   |

\* statistically significant,  $p < .05$

Supplement Table 6: F-Values for the increase in the explained variance ( $\Delta R^2$ ) with respect to PS-TRE, literacy, and numeracy for people that are out of the labor force (OLF).

|                                | df1 | df2 | PS-TRE  | Literacy | Numeracy |
|--------------------------------|-----|-----|---------|----------|----------|
| Age (generation)               | 1   | 704 | 174.90* | 73.04*   | 21.03*   |
| Gender (f)                     | 1   | 704 | 13.44*  | 3.12*    | 20.90*   |
| Migration (y)                  | 1   | 704 | 45.66*  | 30.99*   | 31.00*   |
| Years of Education             | 1   | 704 | 107.98* | 178.76*  | 178.53*  |
| Cultural Capital (#Books >100) | 1   | 704 | 18.16*  | 36.76*   | 43.59*   |
| Further Education (y)          | 1   | 704 | 7.27*   | 4.43*    | 1.48     |
| Computer use at Home           | 2   | 703 | 23.52*  | 10.79*   | 13.66*   |

\* statistically significant,  $p < .05$

Supplement Figure 1: Means and 95% confidence intervals for the impacts on PS-TRE (1a, 1b, 1c), literacy (2a, 2b, 2c) and numeracy (3a, 3b, 3c) for the three subsamples of employed people with computer use at work and at home (Employed; 1a, 2a, 3a), employed people with computer use only at home (1b, 2b, 3b), and people that are out of the labor force (1c, 2c, 3c).

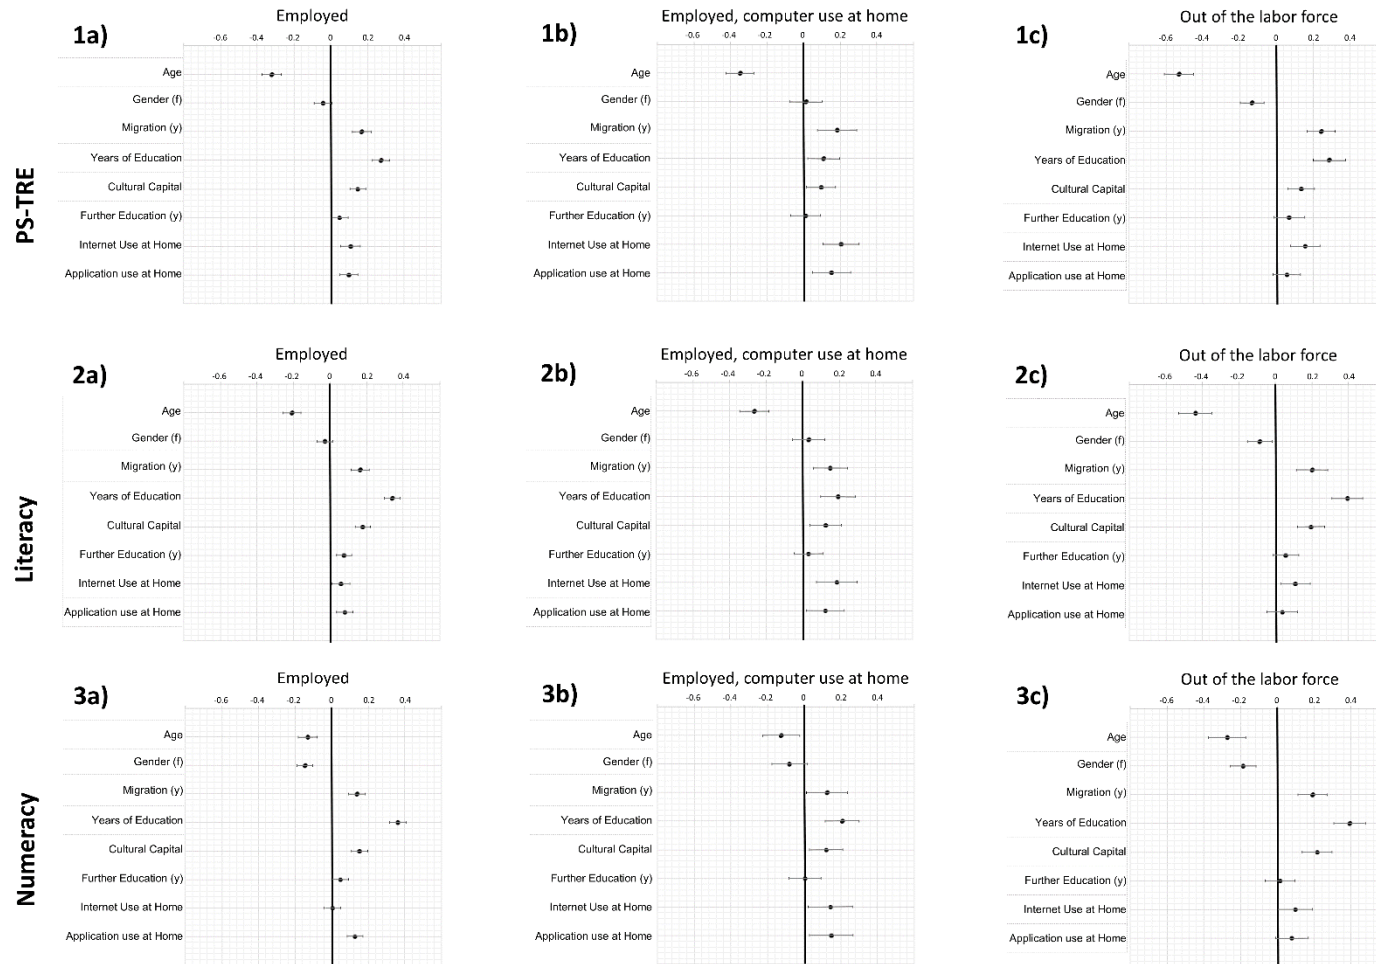

Supplement: mmc1.pdf [file mmc1.pdf]
